# Supplementary material
Source: Springer Nature journal article supplement (https://www.springermedizin.de/resource/supplementary/12889_2006_470_MOESM6_ESM.pdf/9500940)

# 1996

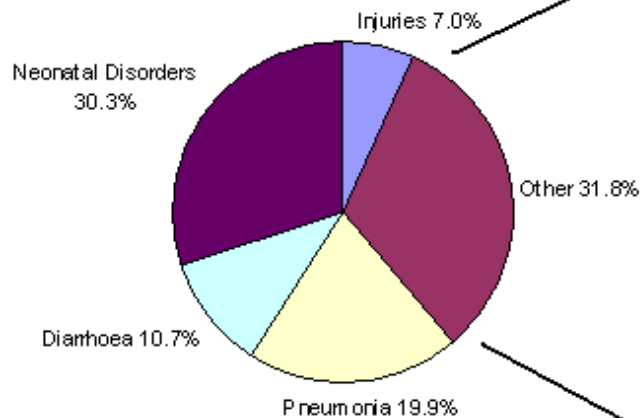

## Others

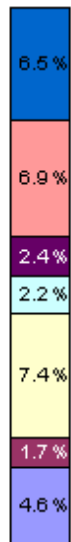

- Miscelanea
- Congenital anomalies
- Pulmonary disorders other than pneumonia
- Nervous system disorders other than meningitis
- Nutritional deficiencies and anaemia
- Cardiopulmonary diseases
- TB, meningitis and sepsis

## Others

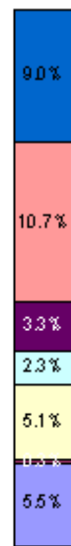

# 2000

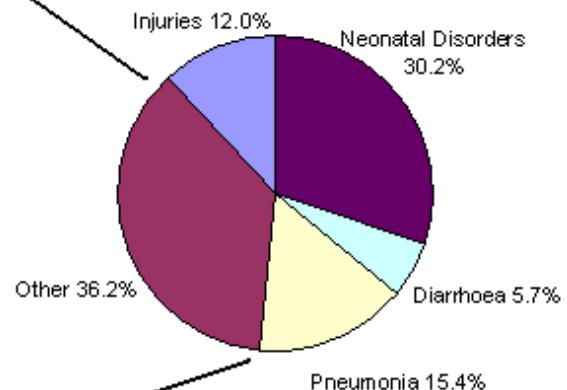

Supplement: MOESM6 [file 9500940]
